# Supplementary material for: Tuning Properties of Sustainable Castor Oil Based Polyurethanes With Bacterial Biomass as Fillers
Source: Springer Nature journal article supplement (doi:10.1007/s10924-025-03540-5), 2025-03-04
Supplement: MOESM1 [file 10924_2025_3540_MOESM1_ESM.pdf › 10924_2025_3540_MOESM1_ESM.pdf]

***Supplementary information Journal of Polymers and the Environment***  
**Tuning properties of sustainable castor oil based polyurethanes with  
bacterial biomass as fillers**

Chebrolu Venkateswara Rao<sup>a\*</sup>, Maciej Guzik<sup>b</sup>, Veselin Maslak<sup>c</sup>, Malgorzata Zimowska<sup>b</sup>,  
Jasmina Nikodinovic-Runic<sup>a</sup>, Ivana Aleksic<sup>a</sup>, Marijana Ponjavic<sup>a\*</sup>

*<sup>a</sup>Institute of Molecular Genetics and Genetic Engineering, University of Belgrade, Vojvode Stepe  
444a, 11052 Belgrade, Serbia*

*<sup>b</sup>Jerzy Haber Institute of Catalysis and Surface Chemistry, Polish Academy of Sciences,  
Niezapominajek 8, 30-239 Krakow, Poland*

*<sup>c</sup>Faculty of Chemistry, University of Belgrade, Studentski Trg 12-16, 11158 Belgrade, Serbia*

Chebrolu Venkateswara Rao (co-corresponding author)  
e-mail: chvrao@imgge.bg.ac.rs

Maciej Guzik  
e-mail: maciej.guzik@ikifp.edu.pl

Veselin Maslak  
e-mail: vmaslak@chem.bg.ac.rs

Malgorzata Zimowska  
e-mail: nczimows@cyf-kr.edu.pl

Jasmina Nikodinovic-Runic  
e-mail: jasmina.nikodinovic@imgge.bg.ac.rs

Ivana Aleksic  
e-mail: ivana.aleksic@imgge.bg.ac.rs

Marijana Ponjavic (corresponding author)  
e-mail: mponjavic@imgge.bg.ac.rs

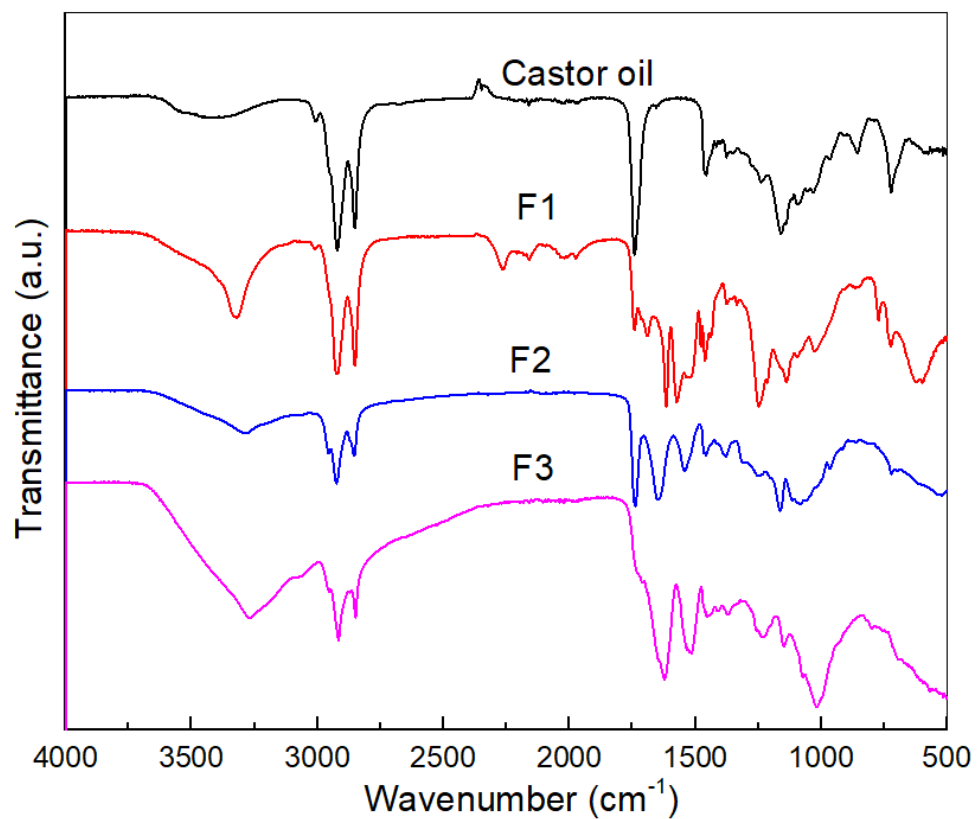

**Fig. S1.** The FTIR spectrum of castor oil and fillers used in the present study.

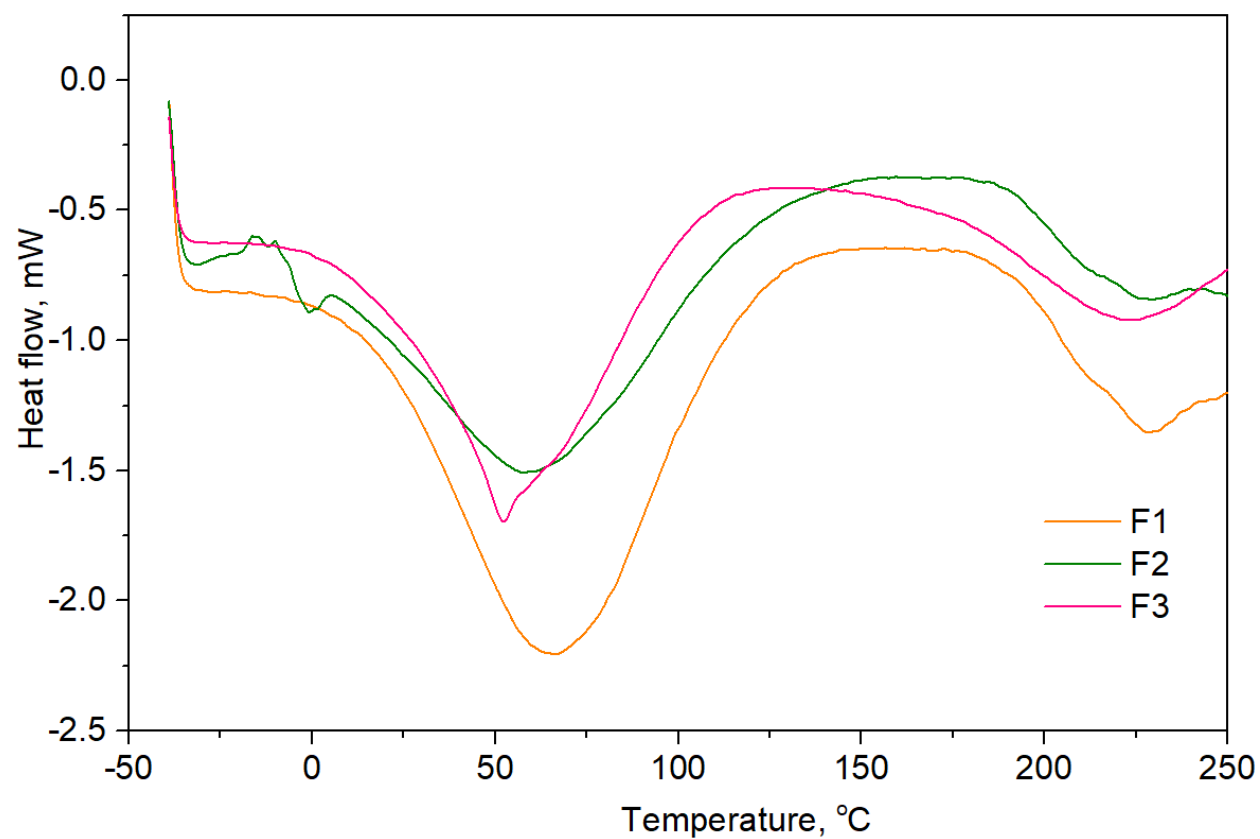

**Fig. S2.** The DSC thermograms of bio-fillers used in the present study.

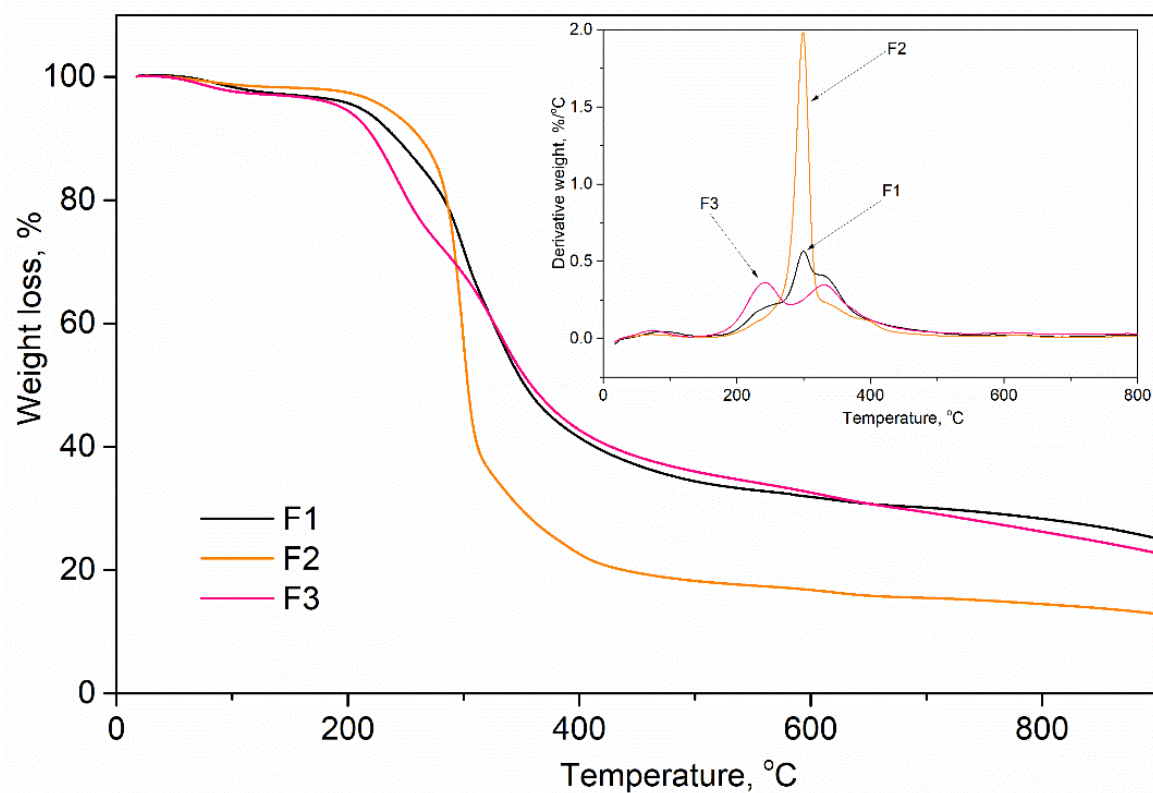

**Fig. S3.** TGA and DTGA graphs of the bacterial biomass fillers.

**Table S1.** The TGA/DTGA of the bacterial biomass fillers.

| Sample    | $T_{5\%}, ^\circ\text{C}$ | $T_{50\%}, ^\circ\text{C}$ | $T_{\max 1}, ^\circ\text{C}$ | $T_{\max 2}, ^\circ\text{C}$ | Residual weight at 800 °C, % |
|-----------|---------------------------|----------------------------|------------------------------|------------------------------|------------------------------|
| <b>F1</b> | 207.8                     | 352.7                      | 238.0                        | 300.1/331.0                  | 25.4                         |
| <b>F2</b> | 233.5                     | 303.3                      | 298.6                        | -                            | 12.9                         |
| <b>F3</b> | 193.9                     | 358.7                      | 239.9                        | 331.0                        | 22.8                         |
